# Supplementary material for: Polyphenol-Rich Liupao Tea Extract Prevents High-Fat Diet-Induced MAFLD by Modulating the Gut Microbiota
Source: MDPI journal article supplement (doi:10.3390/nu14224930), 2022-11-21
Supplement: s1 [file s1]

## Supplementary Materials

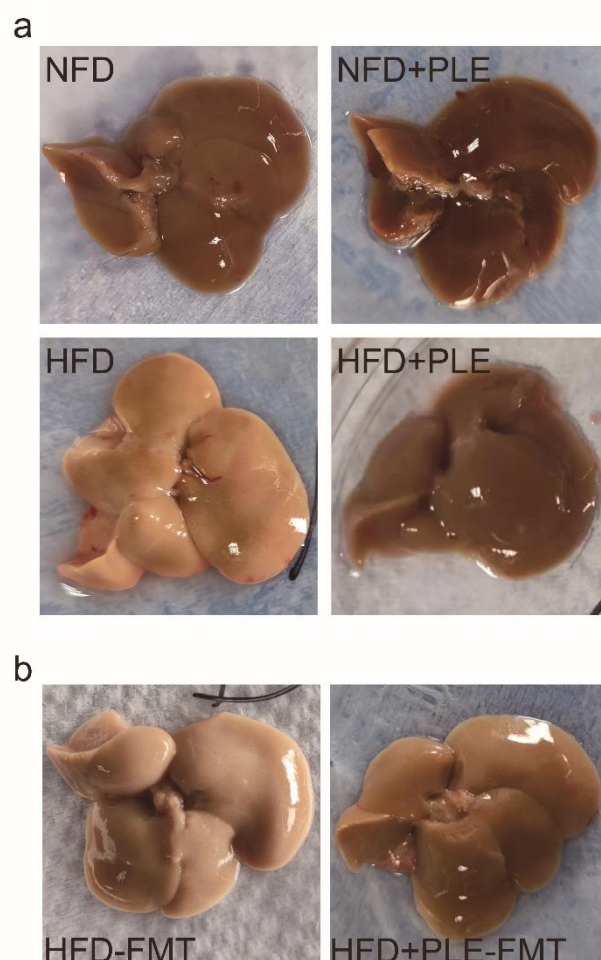

**Figure S1.** Visual observation of the liver of mice in each group.

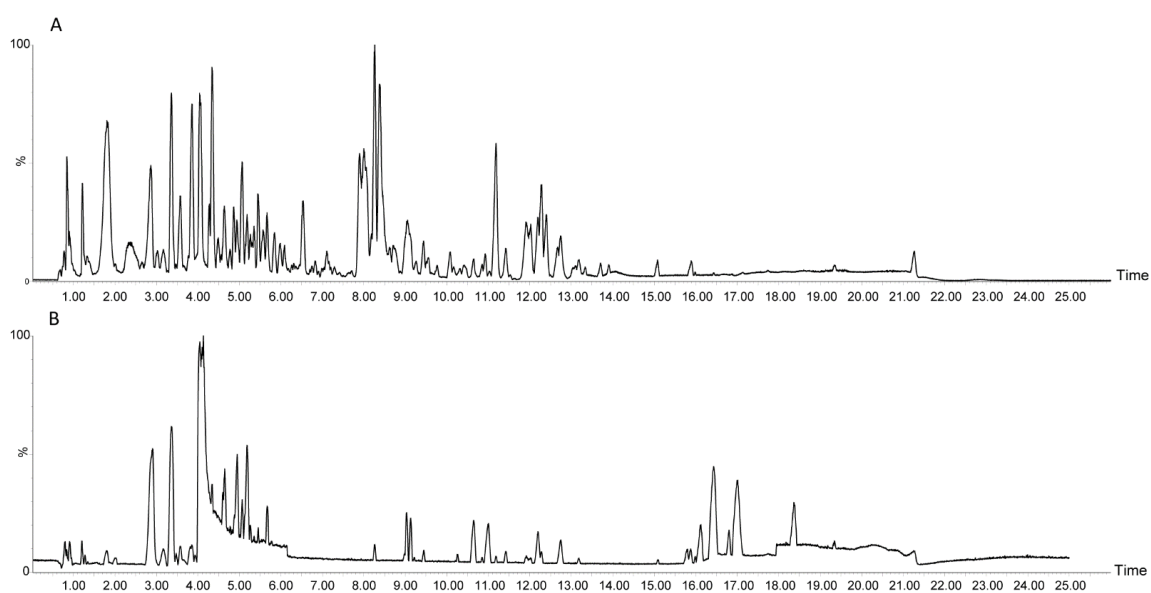

**Figure S2.** Ultra-high-performance liquid chromatography with quadrupole time-of-flight mass spectrometry (UPLC-QTOF/MS) chromatograms of polyphenol-rich Liupao Tea extract (PLE). A: Negative ion mode; B: Positive ion mode.

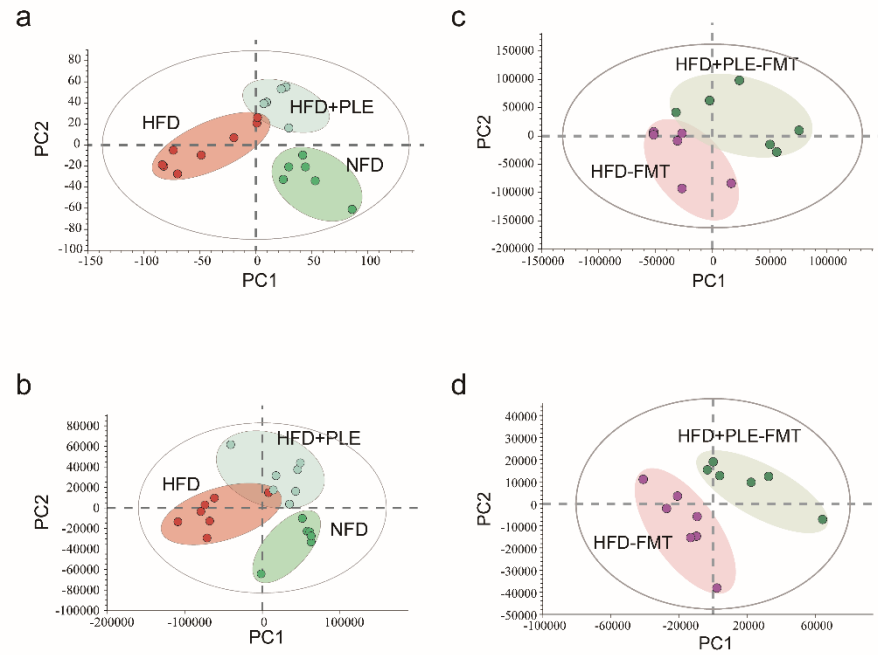

**Figure S3.** PLS-DA score plots based on the UHPLC/Q-TOF MS spectra in each group.

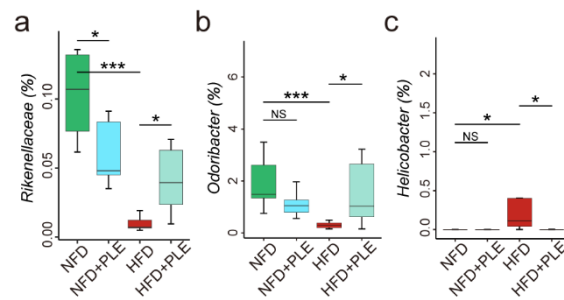

**Figure S4.** Abundance of the *Rikenellaceae*, *Odoribacter*, and *Helicobacter* genera in the intestinal tract of mice in each group.
